# Supplementary material for: Population diversity of cardiovascular outcome trials and real-world patients with diabetes in a Chinese tertiary hospital
Source: PubMed Central journal article supplement — Chin Med J (Engl). 2021 Mar 11;134(11):1317–23. doi: 10.1097/CM9.0000000000001407 (PMC8183749; doi:10.1097/cm9.0000000000001407), 2021-03-11
Supplement: cm9-134-1317-s001.pdf [file cm9-134-1317-s001.pdf]

**Supplementary Table 1: Comparison of high cardiovascular risk inclusion criteria for the EMPA-REG OUTCOME trial and eligible inpatients.**

| The study population in the EMPA-REG OUTCOMES trial                                                                                                                                                                                                                                                                                                                                                                                                                                                                                                                                                                                                                                                                                                                                                                                                                                                                                                                                                                                                                                                                                                                                                                                                                                                                                                                                                                                                                                                                                                                                                                                                                                                                                                                                                                                                                                                                                                                                                                                                                                                                                                              | Eligible inpatients in EMR of WCH                                                                                                                                                                                                                                                                                                                                                                                                                                                                                                                                                                                                                                                                                                                                                                      |
|------------------------------------------------------------------------------------------------------------------------------------------------------------------------------------------------------------------------------------------------------------------------------------------------------------------------------------------------------------------------------------------------------------------------------------------------------------------------------------------------------------------------------------------------------------------------------------------------------------------------------------------------------------------------------------------------------------------------------------------------------------------------------------------------------------------------------------------------------------------------------------------------------------------------------------------------------------------------------------------------------------------------------------------------------------------------------------------------------------------------------------------------------------------------------------------------------------------------------------------------------------------------------------------------------------------------------------------------------------------------------------------------------------------------------------------------------------------------------------------------------------------------------------------------------------------------------------------------------------------------------------------------------------------------------------------------------------------------------------------------------------------------------------------------------------------------------------------------------------------------------------------------------------------------------------------------------------------------------------------------------------------------------------------------------------------------------------------------------------------------------------------------------------------|--------------------------------------------------------------------------------------------------------------------------------------------------------------------------------------------------------------------------------------------------------------------------------------------------------------------------------------------------------------------------------------------------------------------------------------------------------------------------------------------------------------------------------------------------------------------------------------------------------------------------------------------------------------------------------------------------------------------------------------------------------------------------------------------------------|
| <ul style="list-style-type: none"> <li>• History of myocardial infarction &gt;2 months before informed consent.</li> <li>• Evidence of multi-vessel coronary artery disease, i.e., in <math>\geq 2</math> major coronary arteries or the left main coronary artery, documented by any of the following:               <ul style="list-style-type: none"> <li>– Presence of significant stenosis: <math>\geq 50\%</math> luminal narrowing during angiography (coronary or multi-slice computed tomography).</li> <li>– Previous revascularization (percutaneous transluminal coronary angioplasty <math>\pm</math> stent or coronary artery bypass graft &gt;2 months before consent).</li> <li>– The combination of revascularization in one major coronary artery and significant stenosis (<math>\geq 50\%</math> luminal narrowing) in another major coronary artery.</li> </ul> </li> <li>• Evidence of single-vessel coronary artery disease, <math>\geq 50\%</math> luminal narrowing during angiography (coronary or multi-slice computed tomography) not subsequently successfully revascularized, with at least one of the following:               <ul style="list-style-type: none"> <li>– A positive non-invasive stress test for ischemia.</li> <li>– Hospital discharge for unstable angina <math>\leq 12</math> months before consent.</li> </ul> </li> <li>• Unstable angina &gt;2 months before consent with evidence of single- or multi-vessel coronary artery disease.</li> <li>• History of stroke (ischemic or hemorrhagic) &gt;2 months before consent.</li> <li>• Occlusive peripheral artery disease documented by any of the following:               <ul style="list-style-type: none"> <li>– Limb angioplasty, stenting, or bypass surgery.</li> <li>– Limb or foot amputation due to circulatory insufficiency.</li> <li>– Evidence of significant peripheral artery stenosis (<math>&gt;50\%</math> on angiography, or <math>&gt;50\%</math> or hemodynamically significant <i>via</i> non-invasive methods) in 1 limb.</li> <li>– Ankle-brachial index <math>&lt;0.9</math> in <math>\geq 1</math> ankle.</li> </ul> </li> </ul> | <ul style="list-style-type: none"> <li>• Diagnosed with myocardial infarction during the first hospitalization:               <ul style="list-style-type: none"> <li>– ICD-10 codes: I21, I22, I25.2.</li> </ul> </li> <li>• Diagnosed with coronary artery disease.               <ul style="list-style-type: none"> <li>– ICD-10 codes: I20–I25.</li> </ul> </li> <li>• Diagnosed with stroke during the first hospitalization:               <ul style="list-style-type: none"> <li>– ICD-10 codes: I60–I64.</li> </ul> </li> <li>• Diagnosed with peripheral vascular disease during the first hospitalization:               <ul style="list-style-type: none"> <li>– ICD-10 codes: I70, I71, I73.1, I73.8, I73.9, I77.1, I79.0, I79.2, K55.1, K55.8, K55.9, Z95.8, Z95.9.</li> </ul> </li> </ul> |

EMR: Electronic medical record; ICD-10: International Classification of Diseases 10th Revision; WCH: West China Hospital.

**Supplementary Table 2: Comparison of high cardiovascular risk inclusion criteria for the EMPA-REG OUTCOME trial and eligible outpatients.**

| The study population in the EMPA-REG OUTCOMES trial                                                                                                                                                                                                                                                                                                                                                                                                                                                                                                                                                                                                                                                                                                                                                                                                                                                                                                                                                                                                                                                                                                                                                                                                                                                                                                                                                                                                                                                                                                                                                                                                                                                                                                                                                                                                                                                                                                                                                                                                                                                                                                             | Eligible outpatients in EMR of WCH                                                                                                                                                                                                                                                                                            |
|-----------------------------------------------------------------------------------------------------------------------------------------------------------------------------------------------------------------------------------------------------------------------------------------------------------------------------------------------------------------------------------------------------------------------------------------------------------------------------------------------------------------------------------------------------------------------------------------------------------------------------------------------------------------------------------------------------------------------------------------------------------------------------------------------------------------------------------------------------------------------------------------------------------------------------------------------------------------------------------------------------------------------------------------------------------------------------------------------------------------------------------------------------------------------------------------------------------------------------------------------------------------------------------------------------------------------------------------------------------------------------------------------------------------------------------------------------------------------------------------------------------------------------------------------------------------------------------------------------------------------------------------------------------------------------------------------------------------------------------------------------------------------------------------------------------------------------------------------------------------------------------------------------------------------------------------------------------------------------------------------------------------------------------------------------------------------------------------------------------------------------------------------------------------|-------------------------------------------------------------------------------------------------------------------------------------------------------------------------------------------------------------------------------------------------------------------------------------------------------------------------------|
| <ul style="list-style-type: none"> <li>• History of myocardial infarction &gt;2 months before informed consent.</li> <li>• Evidence of multi-vessel coronary artery disease, i.e., in <math>\geq 2</math> major coronary arteries or the left main coronary artery, documented by any of the following:               <ul style="list-style-type: none"> <li>– Presence of significant stenosis: <math>\geq 50\%</math> luminal narrowing during angiography (coronary or multi-slice computed tomography).</li> <li>– Previous revascularization (percutaneous transluminal coronary angioplasty <math>\pm</math> stent or coronary artery bypass graft &gt;2 months before consent).</li> <li>– The combination of revascularization in one major coronary artery and significant stenosis (<math>\geq 50\%</math> luminal narrowing) in another major coronary artery.</li> </ul> </li> <li>• Evidence of single-vessel coronary artery disease, <math>\geq 50\%</math> luminal narrowing during angiography (coronary or multi-slice computed tomography) not subsequently successfully revascularized, with at least 1 of the following:               <ul style="list-style-type: none"> <li>– A positive non-invasive stress test for ischemia.</li> <li>– Hospital discharge for unstable angina <math>\leq 12</math> months before consent.</li> </ul> </li> <li>• Unstable angina &gt;2 months before consent with evidence of single- or multi-vessel coronary artery disease.</li> <li>• History of stroke (ischemic or hemorrhagic) &gt;2 months before consent.</li> <li>• Occlusive peripheral artery disease documented by any of the following:               <ul style="list-style-type: none"> <li>– Limb angioplasty, stenting, or bypass surgery.</li> <li>– Limb or foot amputation due to circulatory insufficiency.</li> <li>– Evidence of significant peripheral artery stenosis (<math>&gt;50\%</math> on angiography, or <math>&gt;50\%</math> or hemodynamically significant <i>via</i> non-invasive methods) in 1 limb.</li> <li>– Ankle-brachial index <math>&lt; 0.9</math> in <math>\geq 1</math> ankle.</li> </ul> </li> </ul> | <ul style="list-style-type: none"> <li>• Diagnosis and disease description including any of the following free words: ASCVD 冠心病 卒中 心肌梗 心梗 心肌缺血 支架术后 冠状动脉 缺血性心脏 心肌缺血 CAD CHD 心绞痛 脑梗 中风 脑出血 脑栓</li> <li>• Using statins and anticoagulants at the same time or using statins and antiplatelet agents simultaneously.</li> </ul> |

EMR: Electronic medical record; WCH: West China Hospital.

**Supplementary Table 3: Results of the telephone survey for the MCID of continuous characteristics.**

| Characteristic                         | Median | IQR       | Range | SE  | Gansu <sup>*</sup> | Chongqing <sup>*</sup> | Sichuan <sup>*</sup> | Tianjin <sup>*</sup> | Shandong <sup>*</sup> | Shanghai <sup>*</sup> | An`hui <sup>*</sup> |
|----------------------------------------|--------|-----------|-------|-----|--------------------|------------------------|----------------------|----------------------|-----------------------|-----------------------|---------------------|
| Age (years)                            | 10.0   | 10.0–12.5 | 15.0  | 1.8 | 5.0                | 10.0                   | 10.0                 | 15.0                 | 10.0                  | 10.0                  | 20.0                |
| BMI (kg/m <sup>2</sup> )               | 3.0    | 2.8–4.0   | 3.0   | 0.4 | 2.0                | 5.0                    | 2.5                  | 3.0                  | 3.0                   | 5.0                   | 3.0                 |
| LDL-c (mmol/L)                         | 1.0    | 0.5–1.0   | 0.75  | 0.1 | 1.0                | 1.0                    | 0.6                  | 1.0                  | 0.4                   | 0.25                  | 1.0                 |
| HDL-c (mmol/L)                         | 0.5    | 0.2–0.5   | 0.5   | 0.1 | 0.5                | 0.5                    | 0.2                  | 0.6                  | 0.2                   | 0.1                   | 0.5                 |
| TG (mmol/L)                            | 2.0    | 0.6–2.0   | 1.8   | 0.3 | 2.0                | 2.0                    | 0.6                  | 2.0                  | 0.5                   | 0.2                   | 2.0                 |
| TC (mmol/L)                            | 1.0    | 0.5–1.5   | 1.5   | 0.2 | 1.0                | 2.0                    | 0.5                  | 1.5                  | 0.5                   | 0.5                   | 1.5                 |
| HbA1c (%)                              | 1.0    | 0.5–1.0   | 1.2   | 0.2 | 1.0                | 1.0                    | 0.5                  | 1.0                  | 0.3                   | 0.5                   | 1.5                 |
| SBP (mmHg)                             | 10.0   | 7.5–12.5  | 15.0  | 2.0 | 10.0               | 10.0                   | 10.0                 | 15.0                 | 5.0                   | 5.0                   | 20.0                |
| DBP (mmHg)                             | 5.0    | 5.0–7.5   | 7.0   | 1.0 | 5.0                | 5.0                    | 5.0                  | 10.0                 | 3.0                   | 5.0                   | 10.0                |
| eGFR (mL/min per 1.73 m <sup>2</sup> ) | 10.0   | 10.0–10.0 | 10.0  | 1.1 | 10.0               | 15.0                   | 10.0                 | 10.0                 | 5.0                   | 10.0                  | 10.0                |

\*One clinical diabetologist from this province of China reported the MCID for each baseline characteristic. BMI: Body mass index; DBP: Diastolic blood pressure; eGFR: Estimated glomerular filtration rate; HbA1c: Glycated hemoglobin A1c; HDL-c: High-density lipoprotein cholesterol; IQR: Interquartile range; LDL-c: Low-density lipoprotein cholesterol; MCID: Minimally clinically important difference; SBP: Systolic blood pressure; SE: Standard error; TC: Total cholesterol; TG: Triglycerides.
